# Supplementary material for: Pulsed laser deposition of large-area manganese oxide nanosheet arrays for high-rate supercapacitors
Source: Royal Society of Chemistry journal article supplement (doi:10.1039/c3nj41023d), 2013-01-01
Supplement: c3nj41023d.pdf [file c3nj41023d.pdf]

Electronic Supplementary Information (ESI)

**Pulsed laser deposition of large-area manganese oxide nanosheet  
arrays for high-rate supercapacitors**

Huanwen Wang, Yalan Wang, Xuefeng Wang<sup>\*</sup>

*Department of Chemistry, Tongji University, Shanghai 200092, China*

Email address: xfwang@tongji.edu.cn

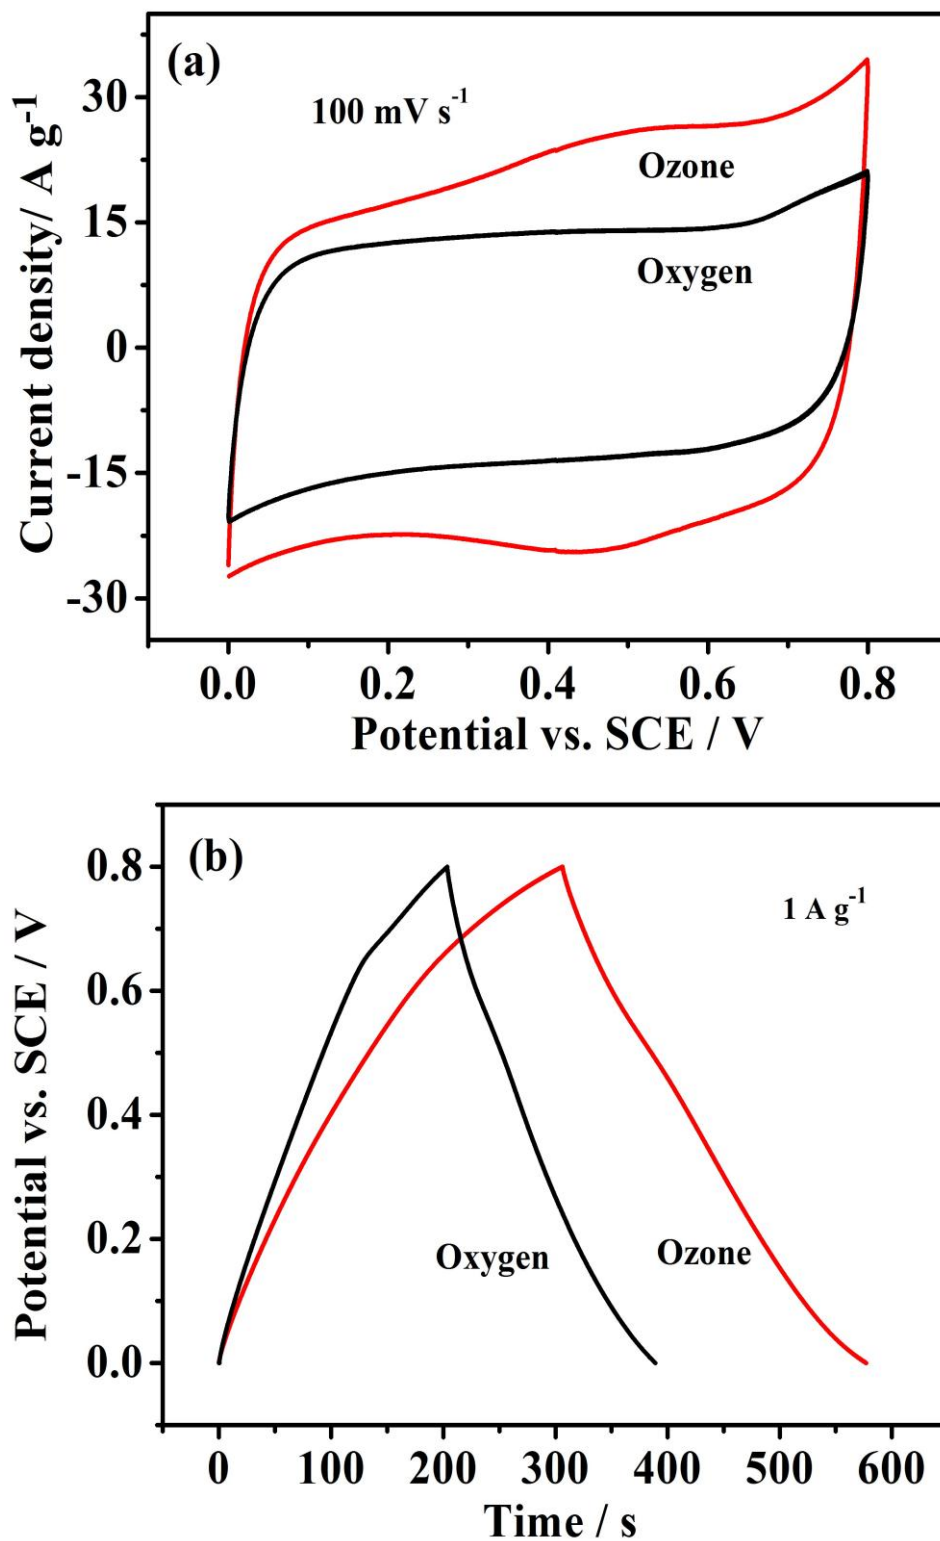

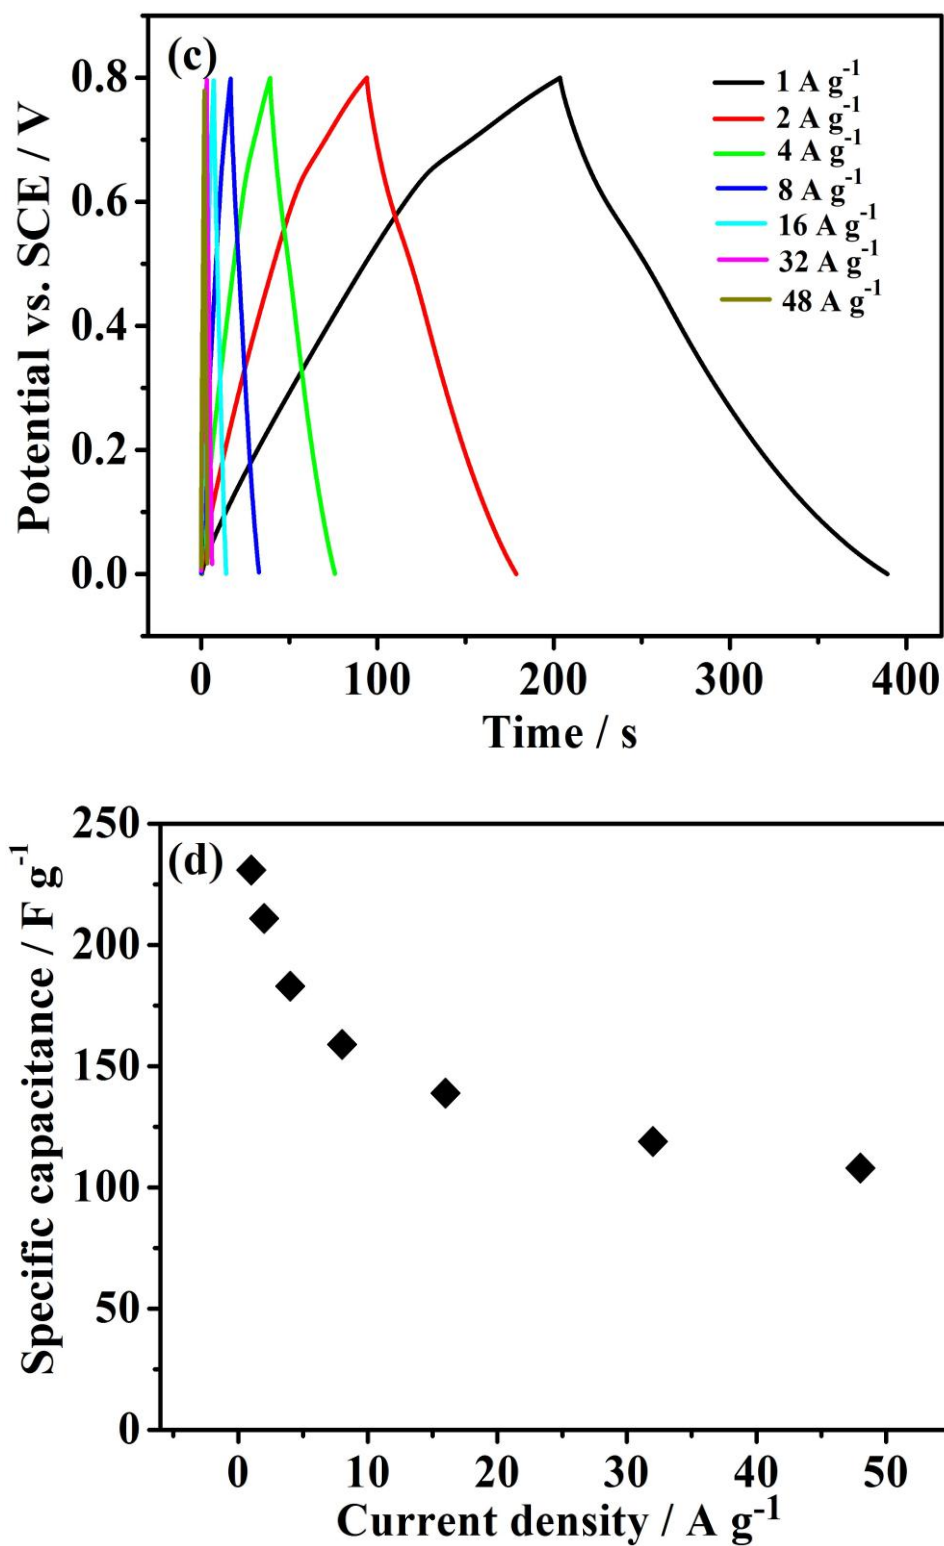

**Fig S1** (a) CV curves and (b) charge-discharge curves of manganese oxide electrode at 1 A g<sup>-1</sup>, (c) charge-discharge curves and (d) specific capacitances of manganese oxide electrode obtained in oxygen at different current densities.

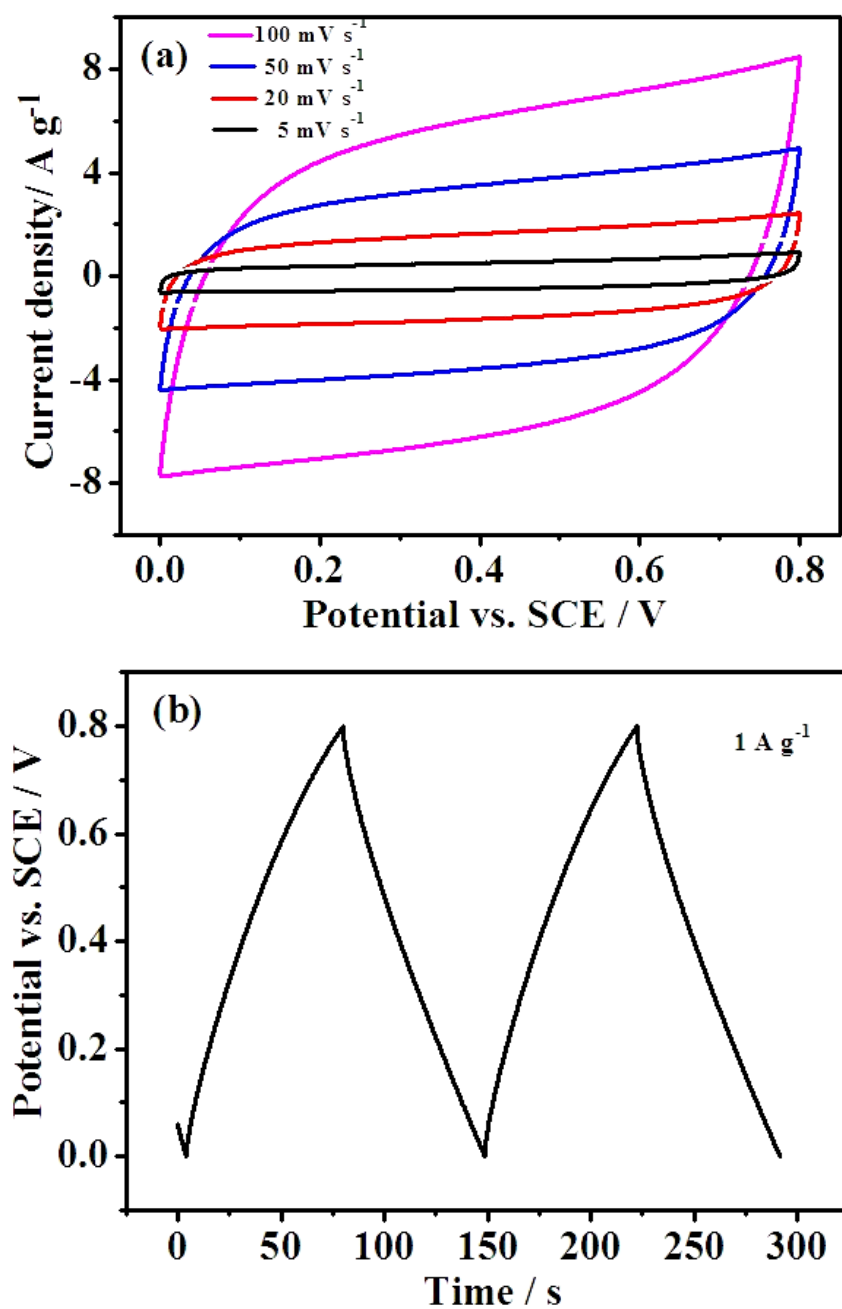

Fig.2 (a)CV and (b) charge-discharge curves obtained by the two-electrode supercapacitor cell.
